# Supplementary material
Source: publisher site journal article supplement (https://www.degruyterbrill.com/publication/isbn/9781614512813/downloadAsset/9781614512813_Contents.pdf?srsltid=AfmBOorGNQloTmzlZ88unVZzrjmqK5A_2CIqr2c-w2hkLlgc00rUo_td)
Supplement: Supplementary file 1 [file 9781614512813_Contents.pdf]

# Table of contents

## Introduction

Larissa Aronin, Joshua Fishman, David Singleton and Muiris Ó Laoire

**Current multilingualism: A new linguistic dispensation — 1**

## **I Language teaching and language learning**

Vivian Cook

### **1 Global English: Central or Atypical Form of SLA? — 27**

Sandro Caruana and David Lasagabaster

### **2 Faraway, so close: Trilingualism in the Basque Autonomous Community and Malta from a socio-educational perspective — 45**

John Harris and Jim Cummins

### **3 Issues in all-Irish education: Strengthening the case for comparative immersion — 69**

Ofelia García

### **4 Informal bilingual acquisition: Dynamic spaces for language education — 99**

## **II Social aspects of current multilingualism**

David Singleton, Larissa Aronin and Lorna Carson

### **5 Minority language use in Ireland: The time dimension — 121**

Guus Extra

### **6 Mapping increasing linguistic diversity in multicultural Europe and abroad — 139**

Jelena Mihaljević Djigunović

### **7 Multilingual attitudes and attitudes to multilingualism in Croatia — 163**

Norbert Dittmar and Paul Steckbauer

### **8 Emerging and conflicting forces of polyphony in the Berlin speech community after the fall of the wall: On the social identity of adolescents — 187**

Moha Ennaji

- 9 Multilingualism in Morocco and the linguistic features of the Casablanca variety — 231**

Camilla Bardel, Ylva Falk and Christina Lindqvist

- 10 Multilingualism in Sweden — 247**

### **III Language Policy**

Joshua Fishman

- 11 Language planning for a decimated and often forgotten non-territorial tongue — 273**

Tjeerd de Graaf

- 12 Endangered languages and endangered archives in the Russian Federation — 279**

Renate Kärchner-Ober

- 13 Linguistic quandary in multilingual Malaysia: Socio-political issues, language policy, educational changes — 297**

Vasiliki Georgiou

- 14 Managing language diversity in the Irish health services — 317**

Kathleen Heugh

- 15 Slipping between policy and management: (De)centralized responses to linguistic diversity in Ethiopia and South Africa — 339**

- Index — 373**
